# Supplementary material for: The Enhanced Interhemispheric Functional Connectivity in the Striatum Is Related to the Cognitive Impairment in Individuals With White Matter Hyperintensities
Source: Frontiers journal article supplement (doi:10.3389/fnins.2022.899473), 2022-06-28
Supplement: Data_Sheet_1.xls [file Data_Sheet_1.xls]

## Sheet: Sheet1
	age	gender	education	CR_edu	CR_work	CR_ler	CR	MMSE	MoCA	AVLT-DR	CFT-DR	STROOP C	TMT B	STROOP A	TMT A
004	50	0	16	110	125	78	106	30	26	1	10	35	100	21	31
005	51	0	9	88	92	90	87	29	25	6	11	40	52	18	33
007	54	0	6	80	102	75	81	27	22	3	6	30	90	27	82
009	55	0	0	62	98	90	78	24	25	7	4	21		18
011	55	1	19	122	152	105	135	30	30	7	14	23	48	17	24
013	55	1	15	109	100	90	100	30	30	11	10	20	63	18	40
014	55	0	22	131	130	107	130	30	28	4	13	27	55	13	32
015	56	0	16	113	111	85	104	30	26	6	11	30	55	12	31
017	57	1	9	91	96	94	91	28	28	5	5	38	87	16	42
019	59	1	12	102	110	109	109	29	26	6	3	29	74	11	20
020	60	0	12	102	92	77	87	30	27	4	12	22	126	26	58
021	60	0	16	115	143	101	126	29	27	2	7	35	95	16	45
023	61	1	12	103	120	100	110	27	26	6	9	38	46	16	26
024	62	0	16	116	105	83	102	27	27	4	8	18	91	14	60
025	63	1	12	104	114	101	108	29	26	3	12	23	51	14	32
026	64	1	12	104	93	88	93	28	26	6	1	20	50	14	52
027	64	1	12	104	134	94	114	29	25	4	10	45	100	21	49
028	65	1	6	86	92	95	88	27	21	4	2	48	130	20	114
030	65	1	12	105	107	94	103	30	25	7	9	37	62	17	42
031	65	0	9	95	88	76	82	30	28	7	11	36	167	28	93
034	67	0	9	96	86	118	100	27	26	6	11	40	58	15	49
035	67	1	15	134	117	109	127	30	25	10	12	44	56	22	42
036	67	1	15	115	117	111	119	28	28	2	9	18	55	18	32
037	67	1	12	106	115	104	111	30	27	7	6	45	90	23	30
041	68	1	6	87	106	94	94	28	22	7	4	26	120	20	70
044	68	1	9	97	80	104	91	30	28	6	11	25	69	26	40
045	69	1	12	107	107	85	99	27	27	5	8	22	120	15	65
046	69	0	16	119	132	114	129	30	28	5	12	43	90	13	52
048	70	0	15	117	142	97	125	28	26	4	11	20	119	13	57
052	72	1	15	118	138	96	123	29	25	3	3	19	95	10	40
053	72	0	12	108	89	74	88	29	26	5	8	29	155	14	42
057	73	1	15	118	111	89	108	28	26	0	8	55	197	19	76
058	73	1	16	122	93	90	102	30	27	4	11	16	89	10	72
059	74	1	6	90	83	72	76	26	21	2	7	26	206	12	77
060	74	1	6	90	85	69	75	27	22	4	2	16	720	19	85
061	75	0	9	100	101	78	91	30	25	5	5	40	175	16	61
065	77	0	19	133	128	98	126	30	27	5	3	38	111	11	60
066	80	0	16	125	112	71	104	30	26	4	6	25	51	16	29
subc006	52	1	9	89	114	79	92	29	25	2	8	12	72	11	36
subc009	63	0	14	110	108	71	95	30	29	5	13	19	41	15	24
subc010	73	1	6	90	89	83	83	30	23	6	13	38	86	18	63
subc014	61	0	11	100	111	79	95	29	29	5	8	39	143	27	58
subc015	66	0	12	105	89	70	84	27	26	1	6	31	155	20	79
subc020	54	1	6	80	91	80	79	29	28	9	10	20	54	15	37
subc024	69	1	6	88	87	77	79	25	23	5	5	27	103	26	60
subc026	71	1	12	108	101	76	93	29	26	2	9	72	181	20	74
subc027	69	1	9	97	85	86	86	30	25	6	12	45	164	13	76
subc028	73	0	15	118	126	74	108	30	28	5	12	19	101	12	39
subc030	65	0	12	105	96	72	88	29	25	5	8	37	109	20	61
subc035	61	1	12	103	90	84	90	30	27	0	9	32	360	25	162
subc038	46	0	12	95	93	91	90	28	25	8	12	53	73	29	35
subc045	70	1	5	85	92	91	86	24	18	0	2	33	360	23	169
subc086	67	0	16	118	125	92	115	28	26	8	10	21	148	14	58
subc090	54	1	12	99	93	89	92	30	25	5	12	20	81	19	37
subc097	61	0	12	103	98	86	94	29	28			21	109	14	36
subc098	54	1	6	80	86	93	82	28	25	5	9	17	37	11	22
subc100	75	0	16	123	153	81	125	29	26	3	2	27	104	19	56
subc106	73	1	9	99	83	79	83	28	25	6	5	39	308	12	56
subc107	66	0	15	115	125	92	114	29	28	7	4	31	66	15	36
subc110	59	1	15	111	151	94	124	29	27	3	9	27	47	11	28
subc112	79	1	11	109	94	77	91	29	28	5	7	26	73	14	38
subc113	75	0	14	116	114	93	110	29	28	7	13	12	79	11	63
subc120	64	1	14	111	134	92	116	30	26	6	8	22	83	12	70
subc122	68	0	14	113	115	69	98	28	27	5	6	26	148	20	54
subc123	61	0	14	109	105	87	100	30	27	6	11	33	103	14	89
subc126	61	1	5	81	99	74	79	26	22	13	3	17	85	12	45
subc133	56	1	8	87	100	86	88	29	25	4	6	34	58	17	58
subc136	75	0	11	107	95	76	90	28	26	5	7	32	179	16	123
subc137	70	1	11	104	101	94	100	30	25	2	10	19	63	16	26
subc140	61	0	14	109	124	97	113	29	27	6	8	35	70	17	36
subc142	56	1	11	97	103	88	95	29	25	7	8	23	85	13	65
subc143	72	0	15	118	115	94	112	30	27	5	6	33	155	17	81
subc146	56	1	14	106	111	94	105	29	28	7	7	34	107	18	42
subc147	63	0	14	110	108	95	106	30	25	2	8	25	92	21	59
subh017	62	0	12	103	86	87	89	29	27	3	8	18	62	12	59
subh031	66	0	16	118	120	83	109	30	27	5	13	35	68	16	43
subh032	57	1	12	101	129	78	103	28	28	2	9	23	128	16	37
subh033	57	0	11	97	113	84	98	30	26
subh036	79	0	8	99	75	68	75	29	26	3	0	50	185	29	66
subh037	69	0	15	116	156	84	125	29	28	3	8	26	61	14	70
subh040	62	1	11	100	97	81	90	30	26	6	4	40	120	17	48
subh041	71	0	8	95	97	71	84	28	26		9	21	103	21	80
067	47	1	9	86	115	83	93	28	24	6		17	47	13	31
069	51	1	6	79	94	89	83	29	19	6	1	29	209	16	72
070	52	1	12	98	90	88	90	27	19	7	9	35	135	16	44
072	55	1	12	100	122	90	105	27	22	4	11	40	60	34	43
074	55	0	9	90	100	91	92	29	24	1	10	39	77	26	34
077	55	1	9	90	104	96	96	29	24	9	14	22	71	21	46
079	56	0	15	110	130	84	110	30	24	4	10	24	62	17	61
082	59	0	9	92	106	115	106	29	23	5	4	30	72	20	45
083	59	0	9	92	100	78	87	28	22	2	11	37	240	35	58
085	61	1	12	103	99	90	97	29	23	5	8	28	110	17	60
086	61	1	15	112	120	86	108	27	22	5	11	45	80	14	52
087	61	1	12	103	86	79	86	28	19	4	6	34	146	25	69
088	61	0	9	93	122	102	107	19	24	5	8	42	143	15	60
089	61	0	16	115	122	85	110	29	23	7	3	33	266	15	85
090	62	1	9	94	86	77	81	29	21	4	4	26	109	14	68
092	62	0	12	103	93	72	86	29	21	2	6	52	242	30	84
093	62	1	9	94	82	84	82	24	18	4	12	27	109	15	58
096	63	1	9	94	84	99	90	27	21	0	5	17	120	13	48
102	64	0	9	95	91	78	84	25	22	2	8	35	300	24	105
105	65	1	6	86	90	74	78	28	18	3	7	34	720	23	79
106	65	1	6	86	167	100	123	26	18	1	2	49	360	27	65
107	65	0	12	105	103	84	96	29	24	6	6	35	80	10	43
108	66	0	6	86	92	95	88	25	18	2	5	43	128	20	76
109	66	1	16	118	133	80	114	27	21	5	8	15	50	10	38
114	67	1	12	106	88	76	86	27	17	6	9	21	300	17	89
116	68	0	16	119	97	101	108	30	24	5	10	35	108	19	43
120	69	1	12	107	132	93	114	26	20	2	9	30	140	14	95
121	69	0	9	97	117	73	94	28	22	2	5	27	179	22	83
122	69	0	9	97	109	74	92	28	23	6	4	54	181	20	96
125	71	0	15	124	105	67	98	29	23			29	148	17	53
127	72	1	9	99	97	91	94	28	19	3	5	53	243	19	81
130	72	0	9	99	119	87	102	28	18	0	1	70	514	31	85
131	74	1	12	109	129	100	117	29	24	9	11	27	83	13	45
134	76	0	12	110	110	73	97	27	19	1	11	41	169	23	59
135	76	1	16	123	102	89	107	27	19	4	8	30	126	17	47
138	77	0	16	124	113	79	107	30	24	0	3	30	122	21	69
139	77	1	16	124	108	84	107	29	24	5	2	19	87	23	47
144	79	1	16	125	101	81	103	29	24	7	12	30	89	17	55
subc002	66	1	6	67	92	79	73	20	8			29		55
subc008	63	1	12	104	112	82	99	28	22	1	7	32	75	21	31
subc011	58	0	9	92	88	72	78	30	23	5	7	26	116	18	40
subc016	73	1	0	71	83	71	67	11	10			28	300	26	230
subc025	83	0	16	128	130	97	124	26	22	1	2	70	82	36	52
subc039	64	1	9	95	104	75	88	26	23	3	6	19	71	16	59
subc044	56	1	12	100	96	82	90	27	22	5	8	38	113	28	57
subc051	77	0	9	101	83	82	85	30	22	2	8	77	215	31	69
subc064	53	1	2	67	86	77	69	12	6	0	0	60	301	28	281
subc073	63	0	12	104	88	67	82	28	20	2	3		120		70
subc079	74	1	0	72	81	76	68	18	12			33	360	49	480
subc080	50	0	12	97	98	81	90	26	21		5	45	85	38	41
subc081	63	1	12	104	108	85	99	27	24	5	6	40	97	15	72
subc091	63	0	9	94	89	82	85	29	22	5	2	39	130	18	56
subc092	62	0	9	94	112	77	93	29	22	3	9	56	91	29	44
subc095	55	1	3	71	85	73	69	17	14	1	2	41	360	39	277
subc102	75	1	9	100	84	65	78	30	23			36	134	25	70
subc141	79	1	14	118	112	91	110	29	24
148	47	0	14	102	109	86	99	29	27	5	11	23	46	13	24
151	48	1	9	86	99	94	91	30	25	4	12	30	54	13	47
152	50	1	22	141	123	97	127	30	29	8	12	16	28	13	33
153	50	1	12	97	113	90	100	28	27	3		25	100	14	43
154	50	0	22	129	123	107	126	29	27	4	10	26	42	16	29
155	50	0	9	87	102	94	93	29	30	7	13	17	37	11	22
156	51	0	22	135	124	77	116	28	29	5	13	31	52	23	21
157	51	0	16	110	109	100	109	28	26	4	13	29	55	20	27
158	52	0	19	126	120	92	117	30	28	7	14	30	38	16	23
159	52	1	16	111	113	96	108	29	27	8	14	33	82	16	57
160	53	0	9	89	90	79	81	27	25	3	2	50	87	20	35
162	53	0	12	99	108	91	99	28	26	5	8	43	98	26	62
165	54	0	15	109	101	82	96	29	27	6	14	25	47	14	29
166	54	0	15	121	125	91	116	29	28	5	12	23	55	15	55
169	55	0	15	109	111	75	98	30	28	5	12	22	53	11	34
170	55	0	16	112	117	71	100	30	27	8	12	37	58	24	36
176	56	1	12	100	88	87	89	29	28	6	11	38	128	17	26
177	56	1	16	113	100	97	104	27	25	7	11	14	66	13	40
179	57	0	19	123	124	109	124	30	27	4	2	33	98	16	39
181	57	0	12	101	107	93	100	29	25	4	9	35	98	24	40
185	58	1	12	101	93	71	85	27	25	6	5		43		37
186	58	1	15	111	121	98	113	30	29	9	10	24	64	12	39
187	58	0	12	101	99	85	93	30	28	8	13	23	47	15	23
188	58	1	12	101	112	77	96	27	25	7	7	26	46	16	38
189	58	0	15	111	114	87	105	30	29	8	6	20	98	14	46
193	59	0	22	133	121	79	114	30	27	4	11	35.34	56.27	25.13	30.84
194	59	0	12	102	91	109	101	29	26	6	13	32	71	16	36
195	59	0	12	102	97	91	95	29	25	4	7	43	56	18	32
196	60	0	16	115	143	80	117	30	28	5	5	21	50	14	31
197	60	0	12	102	99	81	92	28	25	5	13	24	82	17	44
198	60	0	12	104	103	90	98	30	27	4	11	20	57	16	47
201	60	1	15	112	109	88	104	28	29	5	11	33	73	14	70
202	61	0	15	112	120	83	107	30	27	6	14	36.7	50	22	37
205	61	0	12	103	85	96	93	30	28	2	13	30	140	14	48
206	61	1	16	115	124	106	120	29	25	8	6	19	101	15	61
209	62	1	6	84	101	93	91	29	22	2	8	19	132	16	81
211	63	0	9	94	117	73	93	28	26	3	14	24.2	60.57	16.32	43.32
212	63	0	15	113	121	88	110	29	28	10	14	29	73	16	31
213	63	0	15	113	119	104	116	30	27	6	5	24	83	16	56
219	63	1	0	66	91	81	73	22	20	0
220	63	1	15	113	108	78	99	29	26	0	1
222	64	0	15	114	113	79	103	30	28	4	7	36	111	24	50
223	64	0	22	136	156	116	148	28	27	7	5	21	53	12	36
224	64	1	9	95	108	97	100	30	28	8	6	29	59	11	35
225	65	0	12	105	129	92	112	28	25	3	6	31	114	23	48
226	65	0	15	114	107	83	102	29	27	7	5	24	69	15	36
227	65	0	9	108	101	90	99	30	28			21	21	10	29
228	65	1	12	105	102	88	98	28	26	5	8	34	138	15	64
231	65	1	12	103	83	85	88	29	25	3	6	51	210	24	100
232	66	0	12	105	118	78	101	29	26	6	12	14	77	15	70
234	67	1	9	96	89	84	86	30	26	5	9	23	100	12	38
236	67	1	9	96	92	87	89	29	27	12	11	26	46	14	32
237	68	1	0	68	97	79	76	24	17						90
238	68	1	9	97	95	108	100	28	26	7	9	33	152	13	56
239	68	0	12	106	94	87	94	29	28	5	9	40	150	30	60
240	68	1	6	87	87	91	85	30	20	2	4	44	720	17	114
241	69	1	12	107	107	95	104	29	28	3	9	36	129	18	63
242	69	0	16	119	121	93	115	30	28	5	14	30	37	17	33
243	70	1	16	120	116	105	118	29	30	7	13	17	55	16	43
244	72	0	15	119	108	89	107	30	28	7	11	37	58	16	29
245	73	1	6	90	85	94	86	28	24	6	2	30	90	20	60
246	74	1	6	90	92	79	83	27	21	3	2	33	138	17	56
247	75	1	9	100	82	98	92	27	27	3	9	52	262	33	74
250	78	0	6	93	74	74	73	25	21	0	6	26	178	21	103
001	48	0	6	77	88	79	75	30	27	7	7	25	69	13.4	38
006	53	0	16	114	121	95	114	30	28	8	12	39	65	22	52
010	55	0	9	90	104	87	92	30	27	3	6	24	62	15	30
016	57	1	6	82	94	84	81	25	21	4	0	42	166	35	85
042	68	0	15	119	130	98	121	29	26	5	6	39	90	48	48
047	70	1	6	88	83	77	77	26	20	3	3	31	720	17	89
subc145	57	0	11	97	110	82	96	30	25	7	12	25	53	22	37
subh001	63	0	16	116	134	95	120	30	28	10	13	31	85	17	39
subh002	56	1	12	100	88	90	91	28	27			36	97	13	42
subh003	49	0	22	128	121	85	115	29	29			24	56	14	38
subh004	64	1	15	114	111	102	112	28	28	2	9	23	128	16	37
subh005	49	1	8	84	91	83	82	29	25	4	8	43	71	18	46
subh006	61	0	16	115	126	71	105	30	29	5	13	14	55	12	38
subh007	53	0	12	99	101	83	92	29	25	7	11	40	196	17	77
subh008	57	1	22	132	151	100	137	30	29	9	13	31	65	19	38
subh009	56	0	9	91	88	71	78	28	30	4	10	72	82	22	59
subh010	62	1	16	116	127	97	118	30	26	5	11	19	86	14	59
subh011	68	1	4	81	87	78	76	23	20			28	234	49	180
subh012	59	1	12	102	85	92	91	29	28	5	12	29	63	21	43
subh013	47	0	16	108	109	91	103	30	30	8	11	24	42	12	30
subh018	72	1	6	89	82	90	83	29	26	6	9	34	288	24	127
subh023	53	0	15	108	114	86	103	30	27	5	10	28	105	12	59
subh024	75	1	0	72	92	83	77	21	15	2		29		27
subh025	55	1	16	112	106	95	105	29	29	9	14	19	50	13	27
subh029	75	0	16	123	103	64	95	28	26	3	3	38	110	18	50
subh030	54	1	6	80	97	106	92	27	21
subh034	69	1	8	94	98	86	90	29	25	1	10	24	69	14	32
subh038	57	0	11	97	99	78	89	30	26	2	10	40	65	18	31

## Sheet: Sheet2
	gender	age	edu	MMSE	MoCA	AVLT-DR	CFT-DR	STROOP C	TMT B	CFT	STROOP A	TMT A
No CI01	male	50	16	30	26	1	10	35	100	13	21	31
No CI02	male	51	9	29	25	6	11	40	52	12	18	33
No CI03	male	54	6	27	22	3	6	30	90	9	27	82
No CI04	male	55	0	24	25	7	4	21		4	18
No CI05	female	55	19	30	30	7	14	23	48	14	17	24
No CI06	female	55	15	30	30	11	10	20	63	13	18	40
No CI07	male	55	22	30	28	4	13	27	55	14	13	32
No CI08	male	56	16	30	26	6	11	30	55	11	12	31
No CI09	female	57	9	28	28	5	5	38	87	8	16	42
No CI10	female	59	12	29	26	6	3	29	74	10	11	20
No CI11	male	60	12	30	27	4	12	22	126	12	26	58
No CI12	male	60	16	29	27	2	7	35	95	11	16	45
No CI13	female	61	12	27	26	6	9	38	46	9	16	26
No CI14	male	62	16	27	27	4	8	18	91	10	14	60
No CI15	female	63	12	29	26	3	12	23	51	10	14	32
No CI16	female	64	12	28	26	6	1	20	50	4	14	52
No CI17	female	64	12	29	25	4	10	45	100	11	21	49
No CI18	female	65	6	27	21	4	2	48	130	2	20	114
No CI19	female	65	12	30	25	7	9	37	62	8	17	42
No CI20	male	65	9	30	28	7	11	36	167	11	28	93
No CI21	male	67	9	27	26	6	11	40	58	11	15	49
No CI22	female	67	15	30	25	10	12	44	56	12	22	42
No CI23	female	67	15	28	28	2	9	18	55	6	18	32
No CI24	female	67	12	30	27	7	6	45	90	6	23	30
No CI25	female	68	6	28	22	7	4	26	120	7	20	70
No CI26	female	68	9	30	28	6	11	25	69	10	26	40
No CI27	female	69	12	27	27	5	8	22	120	9	15	65
No CI28	male	69	16	30	28	5	12	43	90	12	13	52
No CI29	male	70	15	28	26	4	11	20	119	13	13	57
No CI30	female	72	15	29	25	3	3	19	95	7	10	40
No CI31	male	72	12	29	26	5	8	29	155	8	14	42
No CI32	female	73	15	28	26	0	8	55	197	12	19	76
No CI33	female	73	16	30	27	4	11	16	89	11	10	72
No CI34	female	74	6	26	21	2	7	26	206	10	12	77
No CI35	female	74	6	27	22	4	2	16	720	7	19	85
No CI36	male	75	9	30	25	5	5	40	175	13	16	61
No CI37	male	77	19	30	27	5	3	38	111	6	11	60
No CI38	male	80	16	30	26	4	6	25	51	9	16	29
No CI39	female	52	9	29	25	2	8	12	72	10	11	36
No CI40	male	63	14	30	29	5	13	19	41	12	15	24
No CI41	female	73	6	30	23	6	13	38	86	13	18	63
No CI42	male	61	11	29	29	5	8	39	143	10	27	58
No CI43	male	66	12	27	26	1	6	31	155	8	20	79
No CI44	female	54	6	29	28	9	10	20	54	13	15	37
No CI45	female	69	6	25	23	5	5	27	103	6	26	60
No CI46	female	71	12	29	26	2	9	72	181	9	20	74
No CI47	female	69	9	30	25	6	12	45	164	12	13	76
No CI48	male	73	15	30	28	5	12	19	101	12	12	39
No CI49	male	65	12	29	25	5	8	37	109	7	20	61
No CI50	female	61	12	30	27	0	9	32	360	9	25	162
No CI51	male	46	12	28	25	8	12	53	73	11	29	35
No CI52	female	70	5	24	18	0	2	33	360	4	23	169
No CI53	male	67	16	28	26	8	10	21	148	10	14	58
No CI54	female	54	12	30	25	5	12	20	81	11	19	37
No CI55	male	61	12	29	28			21	109		14	36
No CI56	female	54	6	28	25	5	9	17	37	11	11	22
No CI57	male	75	16	29	26	3	2	27	104	6	19	56
No CI58	female	73	9	28	25	6	5	39	308	5	12	56
No CI59	male	66	15	29	28	7	4	31	66	7	15	36
No CI60	female	59	15	29	27	3	9	27	47	9	11	28
No CI61	female	79	11	29	28	5	7	26	73	8	14	38
No CI62	male	75	14	29	28	7	13	12	79	13	11	63
No CI63	female	64	14	30	26	6	8	22	83	8	12	70
No CI64	male	68	14	28	27	5	6	26	148	10	20	54
No CI65	male	61	14	30	27	6	11	33	103	12	14	89
No CI66	female	61	5	26	22	13	3	17	85	7	12	45
No CI67	female	56	8	29	25	4	6	34	58	8	17	58
No CI68	male	75	11	28	26	5	7	32	179	7	16	123
No CI69	female	70	11	30	25	2	10	19	63	13	16	26
No CI70	male	61	14	29	27	6	8	35	70	10	17	36
No CI71	female	56	11	29	25	7	8	23	85	10	13	65
No CI72	male	72	15	30	27	5	6	33	155	7	17	81
No CI73	female	56	14	29	28	7	7	34	107	9	18	42
No CI74	male	63	14	30	25	2	8	25	92	8	21	59
No CI75	male	62	12	29	27	3	8	18	62	8	12	59
No CI76	male	66	16	30	27	5	13	35	68	13	16	43
No CI77	female	57	12	28	28	2	9	23	128	10	16	37
No CI78	male	57	11	30	26
No CI79	male	79	8	29	26	3	0	50	185	6	29	66
No CI80	male	69	15	29	28	3	8	26	61	10	14	70
No CI81	female	62	11	30	26	6	4	40	120	9	17	48
No CI82	male	71	8	28	26		9	21	103	10	21	80
CI01	female	47	9	28	24	6		17	47		13	31
CI02	female	51	6	29	19	6	1	29	209	7	16	72
CI03	female	52	12	27	19	7	9	35	135	7	16	44
CI04	female	55	12	27	22	4	11	40	60	11	34	43
CI05	male	55	9	29	24	1	10	39	77	12	26	34
CI06	female	55	9	29	24	9	14	22	71	10	21	46
CI07	male	56	15	30	24	4	10	24	62	10	17	61
CI08	male	59	9	29	23	5	4	30	72	8	20	45
CI09	male	59	9	28	22	2	11	37	240	10	35	58
CI10	female	61	12	29	23	5	8	28	110	9	17	60
CI11	female	61	15	27	22	5	11	45	80	9	14	52
CI12	female	61	12	28	19	4	6	34	146	7	25	69
CI13	male	61	9	19	24	5	8	42	143	12	15	60
CI14	male	61	16	29	23	7	3	33	266	3	15	85
CI15	female	62	9	29	21	4	4	26	109	7	14	68
CI16	male	62	12	29	21	2	6	52	242	6	30	84
CI17	female	62	9	24	18	4	12	27	109	12	15	58
CI18	female	63	9	27	21	0	5	17	120	5	13	48
CI19	male	64	9	25	22	2	8	35	300	9	24	105
CI20	female	65	6	28	18	3	7	34	720	9	23	79
CI21	female	65	6	26	18	1	2	49	360	3	27	65
CI22	male	65	12	29	24	6	6	35	80	9	10	43
CI23	male	66	6	25	18	2	5	43	128	7	20	76
CI24	female	66	16	27	21	5	8	15	50	9	10	38
CI25	female	67	12	27	17	6	9	21	300	10	17	89
CI26	male	68	16	30	24	5	10	35	108	10	19	43
CI27	female	69	12	26	20	2	9	30	140	8	14	95
CI28	male	69	9	28	22	2	5	27	179	7	22	83
CI29	male	69	9	28	23	6	4	54	181	8	20	96
CI30	male	71	15	29	23			29	148		17	53
CI31	female	72	9	28	19	3	5	53	243	6	19	81
CI32	male	72	9	28	18	0	1	70	514	3	31	85
CI33	female	74	12	29	24	9	11	27	83	11	13	45
CI34	male	76	12	27	19	1	11	41	169	11	23	59
CI35	female	76	16	27	19	4	8	30	126	8	17	47
CI36	male	77	16	30	24	0	3	30	122	5	21	69
CI37	female	77	16	29	24	5	2	19	87	8	23	47
CI38	female	79	16	29	24	7	12	30	89	11	17	55
CI39	female	66	6	20	8			29			55
CI40	female	63	12	28	22	1	7	32	75	8	21	31
CI41	male	58	9	30	23	5	7	26	116	9	18	40
CI42	female	73	0	11	10			28	300		26	230
CI43	male	83	16	26	22	1	2	70	82	5	36	52
CI44	female	64	9	26	23	3	6	19	71	11	16	59
CI45	female	56	12	27	22	5	8	38	113	12	28	57
CI46	male	77	9	30	22	2	8	77	215	13	31	69
CI47	female	53	2	12	6	0	0	60	301	4	28	281
CI48	male	63	12	28	20	2	3		120	7		70
CI49	female	74	0	18	12			33	360		49	480
CI50	male	50	12	26	21		5	45	85	8	38	41
CI51	female	63	12	27	24	5	6	40	97	5	15	72
CI52	male	63	9	29	22	5	2	39	130	8	18	56
CI53	male	62	9	29	22	3	9	56	91	9	29	44
CI54	female	55	3	17	14	1	2	41	360	3	39	277
CI55	female	75	9	30	23			36	134		25	70
CI56	female	79	14	29	24
HC01	male	47	14	29	27	5	11	23	46	11	13	24
HC02	female	48	9	30	25	4	12	30	54	11	13	47
HC03	female	50	22	30	29	8	12	16	28	12	13	33
HC04	female	50	12	28	27	3		25	100		14	43
HC05	male	50	22	29	27	4	10	26	42	11	16	29
HC06	male	50	9	29	30	7	13	17	37	13	11	22
HC07	male	51	22	28	29	5	13	31	52	13	23	21
HC08	male	51	16	28	26	4	13	29	55	14	20	27
HC09	male	52	19	30	28	7	14	30	38	14	16	23
HC10	female	52	16	29	27	8	14	33	82	14	16	57
HC11	male	53	9	27	25	3	2	50	87	8	20	35
HC12	male	53	12	28	26	5	8	43	98	7	26	62
HC13	male	54	15	29	27	6	14	25	47	14	14	29
HC14	male	54	15	29	28	5	12	23	55	13	15	55
HC15	male	55	15	30	28	5	12	22	53	13	11	34
HC16	male	55	16	30	27	8	12	37	58	13	24	36
HC17	female	56	12	29	28	6	11	38	128	10	17	26
HC18	female	56	16	27	25	7	11	14	66	13	13	40
HC19	male	57	19	30	27	4	2	33	98	9	16	39
HC20	male	57	12	29	25	4	9	35	98	9	24	40
HC21	female	58	12	27	25	6	5		43	5		37
HC22	female	58	15	30	29	9	10	24	64	10	12	39
HC23	male	58	12	30	28	8	13	23	47	13	15	23
HC24	female	58	12	27	25	7	7	26	46	5	16	38
HC25	male	58	15	30	29	8	6	20	98	13	14	46
HC26	male	59	22	30	27	4	11	35.34	56.27	10	25.13	30.84
HC27	male	59	12	29	26	6	13	32	71	13	16	36
HC28	male	59	12	29	25	4	7	43	56	12	18	32
HC29	male	60	16	30	28	5	5	21	50	7	14	31
HC30	male	60	12	28	25	5	13	24	82	13	17	44
HC31	male	60	12	30	27	4	11	20	57	11	16	47
HC32	female	60	15	28	29	5	11	33	73	10	14	70
HC33	male	61	15	30	27	6	14	36.7	50	12	22	37
HC34	male	61	12	30	28	2	13	30	140	11	14	48
HC35	female	61	16	29	25	8	6	19	101	12	15	61
HC36	female	62	6	29	22	2	8	19	132	8	16	81
HC37	male	63	9	28	26	3	14	24.2	60.57	11	16.32	43.32
HC38	male	63	15	29	28	10	14	29	73	14	16	31
HC39	male	63	15	30	27	6	5	24	83	9	16	56
HC40	female	63	0	22	20	0				0
HC41	female	63	15	29	26	0	1			0
HC42	male	64	15	30	28	4	7	36	111	8	24	50
HC43	male	64	22	28	27	7	5	21	53	10	12	36
HC44	female	64	9	30	28	8	6	29	59	11	11	35
HC45	male	65	12	28	25	3	6	31	114	9	23	48
HC46	male	65	15	29	27	7	5	24	69	7	15	36
HC47	male	65	9	30	28			21	21	40	10	29
HC48	female	65	12	28	26	5	8	34	138	13	15	64
HC49	female	65	12	29	25	3	6	51	210	10	24	100
HC50	male	66	12	29	26	6	12	14	77	12	15	70
HC51	female	67	9	30	26	5	9	23	100	10	12	38
HC52	female	67	9	29	27	12	11	26	46	11	14	32
HC53	female	68	0	24	17							90
HC54	female	68	9	28	26	7	9	33	152	9	13	56
HC55	male	68	12	29	28	5	9	40	150	7	30	60
HC56	female	68	6	30	20	2	4	44	720	7	17	114
HC57	female	69	12	29	28	3	9	36	129	11	18	63
HC58	male	69	16	30	28	5	14	30	37	13	17	33
HC59	female	70	16	29	30	7	13	17	55	13	16	43
HC60	male	72	15	30	28	7	11	37	58	10	16	29
HC61	female	73	6	28	24	6	2	30	90	4	20	60
HC62	female	74	6	27	21	3	2	33	138	6	17	56
HC63	female	75	9	27	27	3	9	52	262	9	33	74
HC64	male	78	6	25	21	0	6	26	178	12	21	103
HC65	male	48	6	30	27	7	7	25	69	8	13.4	38
HC66	male	53	16	30	28	8	12	39	65	11	22	52
HC67	male	55	9	30	27	3	6	24	62	5	15	30
HC68	female	57	6	25	21	4	0	42	166	10	35	85
HC69	male	68	15	29	26	5	6	39	90	8	48	48
HC70	female	70	6	26	20	3	3	31	720	3	17	89
HC71	male	57	11	30	25	7	12	25	53	13	22	37
HC72	male	63	16	30	28	10	13	31	85	12	17	39
HC73	female	56	12	28	27			36	97		13	42
HC74	male	49	22	29	29			24	56		14	38
HC75	female	64	15	28	28	2	9	23	128	10	16	37
HC76	female	49	8	29	25	4	8	43	71	5	18	46
HC77	male	61	16	30	29	5	13	14	55	14	12	38
HC78	male	53	12	29	25	7	11	40	196	11	17	77
HC79	female	57	22	30	29	9	13	31	65	12	19	38
HC80	male	56	9	28	30	4	10	72	82	9	22	59
HC81	female	62	16	30	26	5	11	19	86	11	14	59
HC82	female	68	4	23	20			28	234		49	180
HC83	female	59	12	29	28	5	12	29	63	12	21	43
HC84	male	47	16	30	30	8	11	24	42	14	12	30
HC85	female	72	6	29	26	6	9	34	288	10	24	127
HC86	male	53	15	30	27	5	10	28	105	10	12	59
HC87	female	75	0	21	15	2		29			27
HC88	female	55	16	29	29	9	14	19	50	14	13	27
HC89	male	75	16	28	26	3	3	38	110	6	18	50
HC90	female	54	6	27	21
HC91	female	69	8	29	25	1	10	24	69	11	14	32
HC92	male	57	11	30	26	2	10	40	65	10	18	31
